# Supplementary material for: Manipulation of the Gut Microbiota Reveals Role in Colon Tumorigenesis
Source: PubMed Central journal article supplement (PMC4863627; doi:10.1128/msphere.00001-15), 2015-11-04

Observed number of tumors

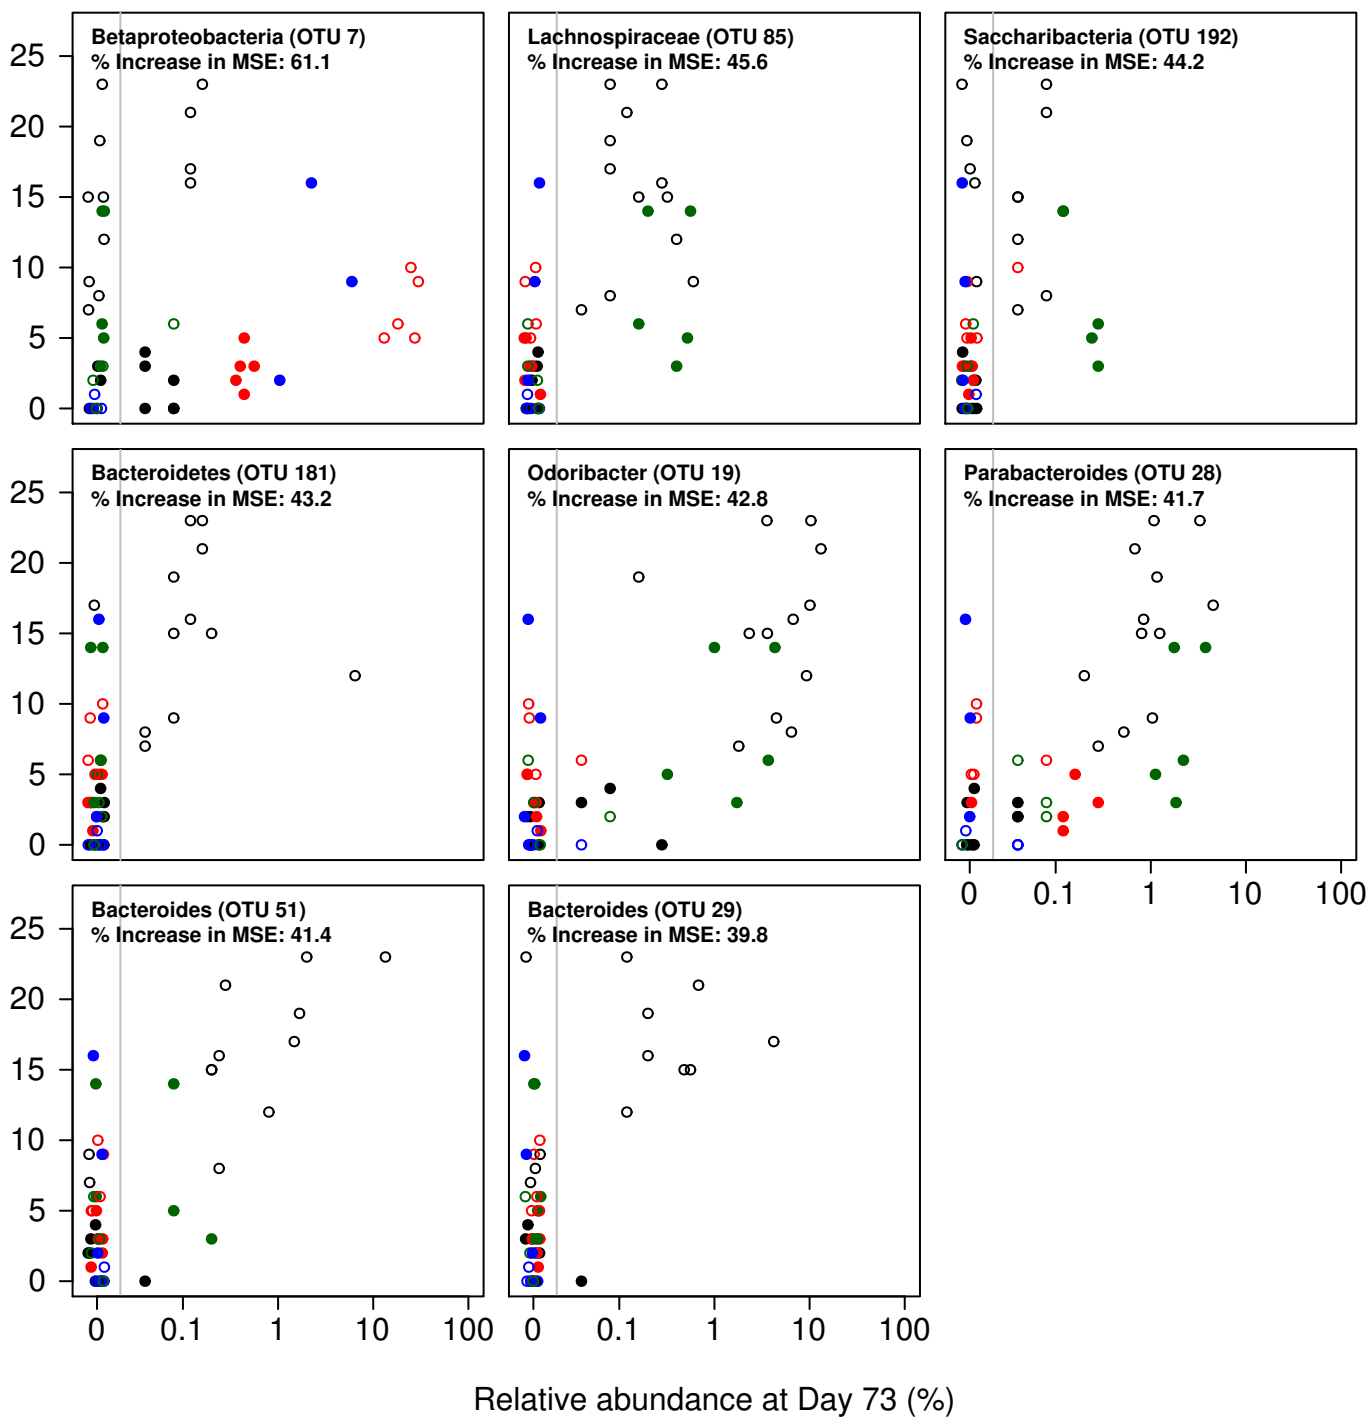

Supplement: sph001160009sf4.pdf [file sph001160009sf4.pdf]
